# Supplementary material for: One-step, template-free synthesis of highly porous nitrogen/sulfur-codoped carbons from a single protic salt and their application to CO2 capture
Source: Royal Society of Chemistry journal article supplement (doi:10.1039/c5ta03575a), 2015-01-01
Supplement: c5ta03575a1.pdf [file c5ta03575a1.pdf]

## Supplementary Information

# **One-step, template-free synthesis of highly porous nitrogen-doped carbons from a single protic salt and their application to CO<sub>2</sub> capture**

Shiguo Zhang, Zhe Li, Kazuhide Ueno, Ryoichi Tatara, Kaoru Dokko and Masayoshi Watanabe\*

*Department of Chemistry and Biotechnology, Yokohama National University,  
79-5 Tokiwadai, Hodogaya-ku, Yokohama 240-8501, Japan.*

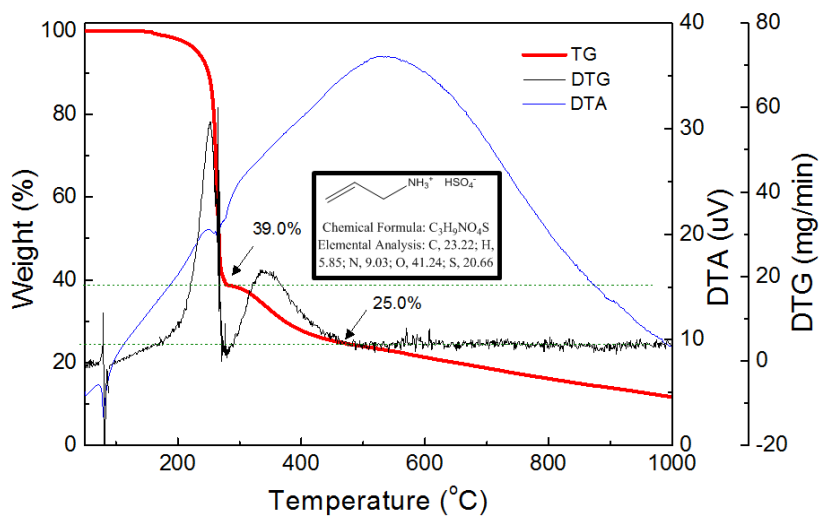

**Figure S1.** TGA of [Allyl-NH<sub>3</sub>][HSO<sub>4</sub>] under an Argon flow.

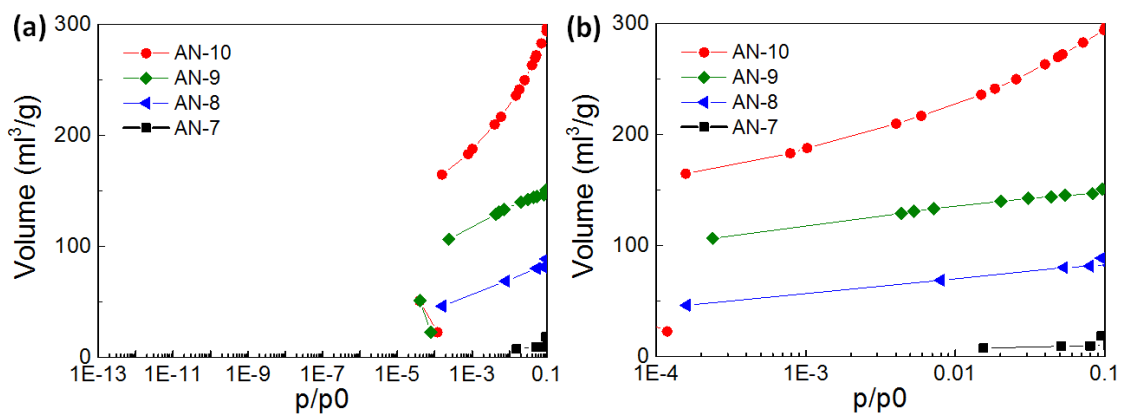

**Figure S2.** N<sub>2</sub> sorption isotherms of carbons derived from [Allyl-NH<sub>3</sub>][HSO<sub>4</sub>] of low pressure regions ( $p/p_0$ : 0-0.1).

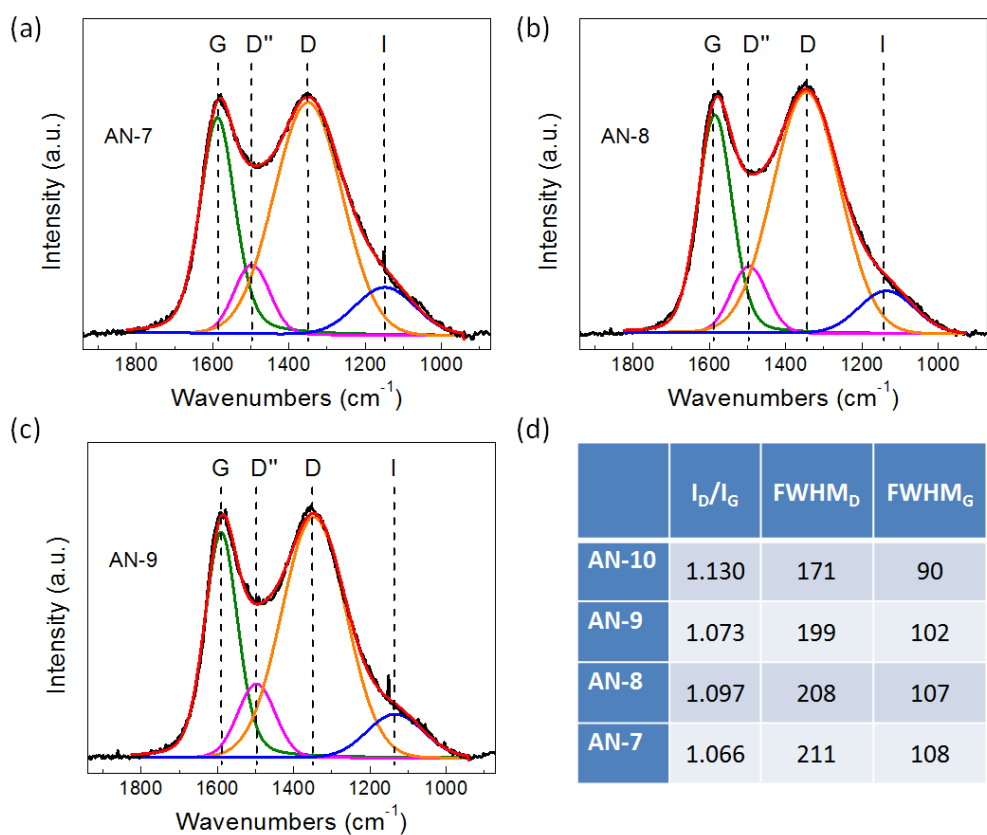

**Figure S3.** (a-c) Deconvolution of the Raman spectra of AN-7, AN-8, and AN-9. (d)  $I_D/I_G$  ratio and FWHM (full width at half maximum) of G or D band for all carbons.

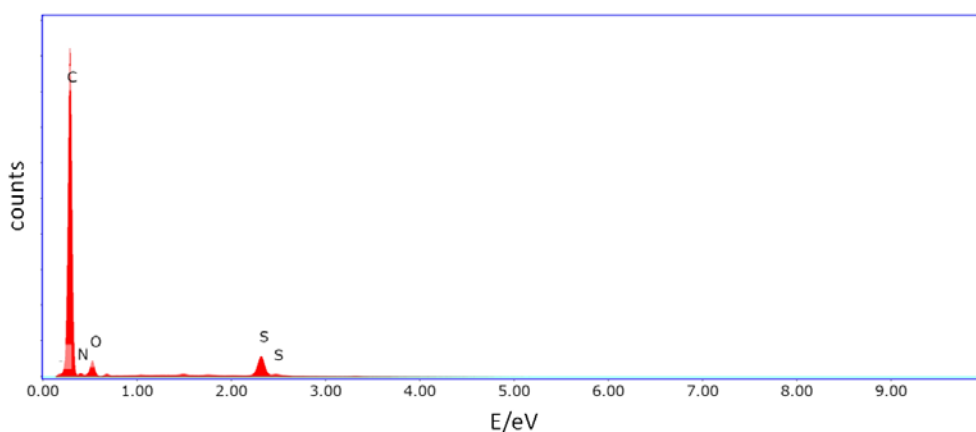

**Figure S4.** EDS spectrum of AN-9.

**Table S1.** Elemental composition of [Allyl-NH<sub>3</sub>][HSO<sub>4</sub>]-derived carbons determined by combustion elemental analysis (wt%, CHNS).

| Carbon | C     | N     | S     | H     | O <sup>a</sup> |
|--------|-------|-------|-------|-------|----------------|
| AN-10  | 60.31 | 1.925 | 2.871 | 3.296 | 31.598         |
| AN-9   | 69.23 | 4.606 | 4.584 | 2.009 | 19.571         |
| AN-8   | 69.98 | 6.520 | 4.845 | 1.835 | 16.820         |
| AN-7   | 70.08 | 7.878 | 4.688 | 2.073 | 15.281         |

<sup>a</sup> The oxygen (O) content was obtained by difference after deducting the C, N, S, H content.
